# Supplementary material for: Two conserved vocal central pattern generators broadly tuned for fast and slow rates generate species-specific vocalizations in Xenopus clawed frogs
Source: eLife journal article supplement (doi:10.7554/elife.86299), 2023-05-15
Supplement: supp [file elife-86299-supp-v1.zip]

### A. Male *X. tropicalis*

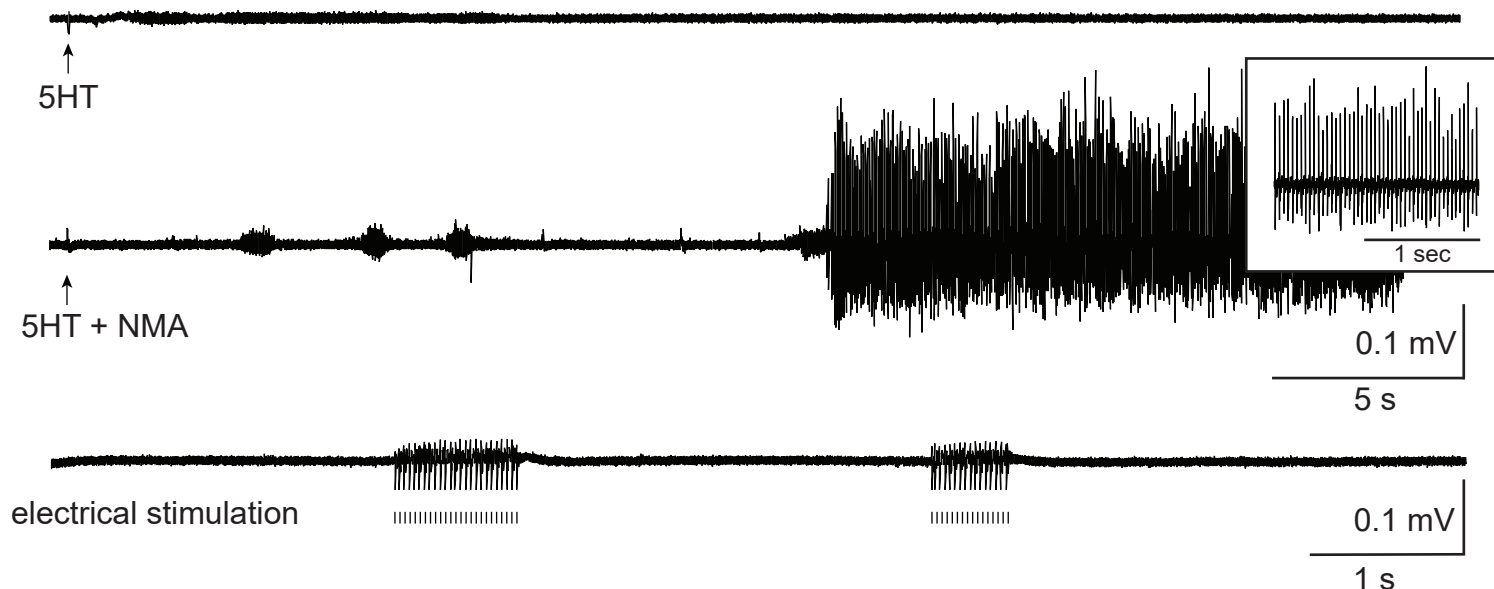

### B. Male *X. amieti*

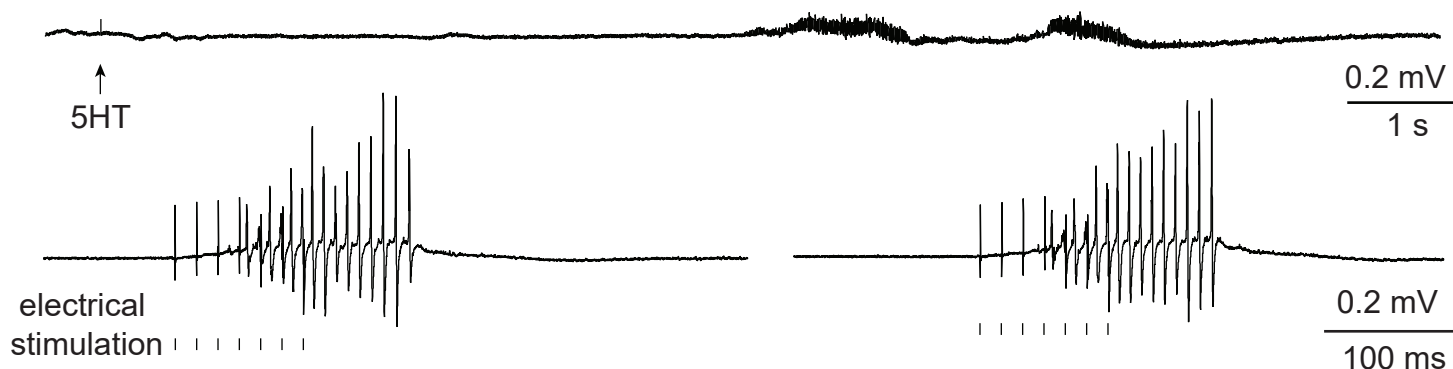

### C. Male *X. laevis*

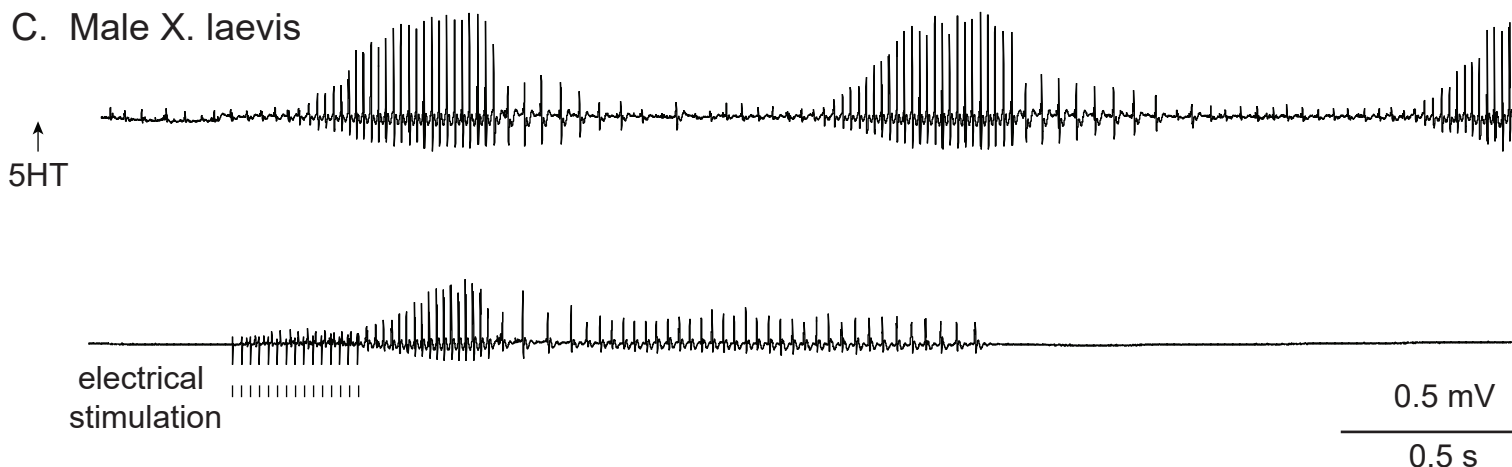

Supplemental Figure 1. Types of stimuli used to elicit fictive advertisement calls. All traces are laryngeal nerve recordings from isolated brain preparations. For all the figures, the upward arrows under the traces indicate the time at which 5HT or 5HT and NMA are applied, and the vertical lines indicate the time at which electrical pulses were delivered to the rostral lateral cerebellum (RLCB, Fig 1D). A. The application of 5HT and NMA, but not 5HT alone nor electrical stimuli delivered to the RLCB elicit fictive advertisement calls from the brains of *X. tropicalis*. Top two traces are obtained from the brain of the same individual, and the bottom trace was obtained from another individual. B. The electrical stimuli delivered to RLCB, but not the application of 5HT elicit fictive advertisement calls from the brains of *X. amieti*. All the recordings were obtained from the brain of the same individual. C. Both the application of 5HT and the electrical stimulation delivered to the RLCB elicit fictive advertisement calls from the brains of male *X. laevis*. Both recordings were obtained from the brain of the same individual. The left-pointing arrow indicates that 5HT was applied to the brain two minutes before the beginning of the trace.
